# Supplementary material for: Genome-Wide DNA Methylation Profile Indicates Potential Epigenetic Regulation of Aging in the Rhesus Macaque Thymus
Source: Int J Mol Sci. 2022 Nov 29;23(23):14984. doi: 10.3390/ijms232314984 (PMC9738698; doi:10.3390/ijms232314984)
Supplement: Supplementary file 1 [file ijms-23-14984-s001.zip › Supplementary tables 1-16.ijms-2013450.xlsx]

## Sheet: Table S1
Table S1. Sequencing statistics of WGBS data. For individual sample, raw reads, raw bases, error rate, Q30, BS conversion rate, sequencing depth and statistics after mapping to the rhesus macaque genome are shown.
Sample name	Raw reads	Raw bases (G)	Error rate (%)	Q30(%)	BS conversion rate (%)	Sequencing depth
YA_1	788027510	118.2	0.0003	0.923	0.9988	36.53
YB_1	763707492	106.92	0.0003	0.913	0.996	35.4
AA_9	796306444	119.44	0.0003	0.924	0.9988	36.91
AB_9	804595218	112.64	0.0003	0.914	0.9957	37.29

## Sheet: Table S2
Table S2. Mapping statistics of WGBS data. For individual sample, sample name, Clean base, Number of paired-end alignments with a unique best hit, Mapping efficiency with a unique best hit, mC/C, mCHG, mCpG, mCHH/mC, mCHG/mC, mCpG/mC and mapping rate are shown.
Sample name	Clean base(Gb)	Number of paired-end alignments with a unique best hit	Mapping efficiency with a unique best hit (%)	mC/C (%)	mCHH	mCHG	mCpG	mCHH/mC (%)	mCHG/mC (%)	mCpG/mC (%)	Mapping rate (%)
YA_1	115.92	289384818	74.2	3.26	29823362	7786750	433593931	6.33	1.65	92	0.9485
YB_1	104.38	270792903	72.1	4.06	56657233	16451012	517262845	9.59	2.78	87.55	0.9576
AA_9	117.2	301019076	76.4	3.11	29553652	7692894	418438073	6.48	1.69	91.81	0.9427
AB_9	110.06	274781380	69.3	3.81	66657678	18420184	473420650	11.92	3.29	84.68	0.9583

## Sheet: Table S3
Table S3. Deduplicating statistics of WGBS data. For individual sample, sample name, total number duplicated alignments removed, duplicated alignments were found at, Total count of deduplicated leftover sequences.
Sample name	Total number duplicated alignments removed	Duplicated alignments were found at different positions	Total count of deduplicated leftover sequences
YA_1	41,481,230 (14.33%)	35560910	247,903,543 (85.67% of total)
YB_1	46,227,122 (17.07%)	38508728	224,565,751 (82.93% of total)
AA_9	43,776,226 (14.54%)	37272295	257,242,834 (85.46% of total)
AB_9	59,732,105 (21.74%)	46507123	215,049,201 (78.26% of total)

## Sheet: Table S4
Table S4. Number of up- and down- DMRs and annotated DMGs.
Tissue	DMR counts			DMG counts
	Up	Down	Total	Up	Down	Complex	Total
Thymus	830	2238	3068	539	1453	430	2422
*Complex means multiple DMRs correspond to the same genes.

## Sheet: Table S5
Table S5. Statistics of allele-special DMRs in two groups.
Groups	Chr	Start	End	Length	cASM count	Gene name	Gene Biotype
Young group	2	130166578	130166626	48	15	ENSMMUG00000043613	lncRNA
	3	16222485	16222532	47	5	ENSMMUG00000039989	protein_coding
	8	8233	8324	91	18	ZNF596	protein_coding
	8	185381	185412	31	8	ZNF596	protein_coding
	9	102918101	102918298	197	46	ENSMMUG00000041193	miRNA
	9	102918354	102918403	49	12	ENSMMUG00000041193	miRNA
	9	102918426	102918453	27	6	ENSMMUG00000041193	miRNA
	13	82886748	82886795	47	11	ENSMMUG00000049033	lncRNA
	13	82886862	82886934	72	12	ENSMMUG00000049033	lncRNA
	13	85093303	85093335	32	6	U6	snRNA
	15	16560486	16560510	24	5	OR1L1	protein_coding
	16	16073246	16073295	49	5	ZNF287	protein_coding
	16	49107718	49107744	26	8	U2	snRNA
	16	49107782	49107831	49	21	U2	snRNA
	16	49107843	49107858	15	5	U2	snRNA
	20	30208607	30208656	49	8	ENSMMUG00000033742	miRNA
	20	30208681	30208729	48	10	ENSMMUG00000033742	miRNA
	20	30208744	30208751	7	6	ENSMMUG00000033742	miRNA
Adult group	2	130161725	130161734	9	6	ENSMMUG00000042979	lncRNA
	2	130163022	130163039	17	6	ENSMMUG00000042979	lncRNA
	3	55730704	55730744	40	8	NUPR2	protein_coding
	6	53714893	53714984	91	14	PELO	protein_coding
	8	8245	8330	85	19	ZNF596	protein_coding
	8	7631068	7631102	34	6	ENSMMUG00000040877	protein_coding
	9	102918097	102918280	183	42	ENSMMUG00000041193	miRNA
	9	102918325	102918403	78	16	ENSMMUG00000041193	miRNA
	9	102918482	102918529	47	7	ENSMMUG00000041193	miRNA
	13	82886860	82886934	74	14	ENSMMUG00000049033	lncRNA
	13	82887001	82887017	16	7	ENSMMUG00000049033	lncRNA
	16	49107843	49107881	38	9	U2	snRNA
	19	22972450	22972465	15	6	ENSMMUG00000040891	protein_coding

## Sheet: Table S6
Table S6. Quality control and mapping statistics of mRNA. For individual sample, clean reads, clean bases and overall alignment rate after mapping to the rhesus macaque genome are shown.
Sample name	Clean base	Clean bases (Gb)	Overall alignment rate (%)
YA_1	19829860742	19.83	90.32
YB_1	13249000478	13.25	91.94
AA_9	17076885944	17.08	89.96
AB_9	19161321886	19.16	89.92

## Sheet: Table S7
Table S7. Statistics of 431 overlapping genes between 786 DEGs and 10,666 DMGs.
Gene	ML(Young_Adult)	Log2(foldchange)	ML(Young_Adult)	log2(foldchange)
A2M	0.2039	2.01008	Hyper	Up
A4GALT	-0.0248	2.25477	Hypo	Up
ABCA12	-0.0735	-2.6587	Hypo	Down
ABCA9	-0.0756	1.96878	Hypo	Up
ABCC9	-0.0522333	2.32606	Hypo	Up
ABCG4	-0.0791	3.7195	Hypo	Up
ACE2	-0.0444	2.83808	Hypo	Up
ACTG2	-0.0544	2.32643	Hypo	Up
ADAM28	-0.1316	-2.1351	Hypo	Down
ADAMDEC1	-0.059625	-4.46563	Hypo	Down
ADAMTS1	0.0393	2.60339	Hyper	Up
ADAMTS15	0.0988	2.26498	Hyper	Up
ADAMTS5	-0.0004	1.94574	Hypo	Up
ADCY5	-0.0586875	3.45808	Hypo	Up
ADGRD1	-0.0993167	3.26307	Hypo	Up
ADGRG3	-0.1411	6.58243	Hypo	Up
ADGRL3	-0.0742071	2.19653	Hypo	Up
AEBP1	-0.0504	1.99247	Hypo	Up
AK5	-0.0737	-2.76931	Hypo	Down
ANGPTL5	0.0617	2.73027	Hyper	Up
AOX1	-0.06705	1.81918	Hypo	Up
APBA2	-0.0139	-2.49245	Hypo	Down
ARNT2	-0.0175167	2.35518	Hypo	Up
ARPP21	-0.0569667	-4.59575	Hypo	Down
ASB2	-0.0646	3.44836	Hypo	Up
ASPM	-0.0589	-5.23804	Hypo	Down
ATAD2	-0.06205	-2.2775	Hypo	Down
ATAD5	-0.0724	-2.87833	Hypo	Down
ATP10B	-0.0792333	-3.10722	Hypo	Down
ATP1A2	-0.04095	2.43407	Hypo	Up
AURKA	-0.011	-2.38545	Hypo	Down
BHMT2	-0.0968	3.47624	Hypo	Up
BMP4	0.1233	2.21097	Hyper	Up
BRCA1	-0.03495	-2.39086	Hypo	Down
BRCA2	0.1716	-3.8771	Hyper	Down
BRIP1	-0.0318	-3.96523	Hypo	Down
BUB1B	-0.0109333	-4.86234	Hypo	Down
C3	-0.13275	2.48444	Hypo	Up
C5AR2	-0.0418	2.90254	Hypo	Up
C7	0.0863	2.67935	Hyper	Up
CADM3	-0.0401	2.8472	Hypo	Up
CADPS	-0.0534143	2.84637	Hypo	Up
CAMK2A	0.00935	2.77758	Hyper	Up
CAMK4	0.06935	-3.48732	Hyper	Down
CARMIL2	-0.1758	-3.37594	Hypo	Down
CATSPERB	-0.111933	2.23581	Hypo	Up
CCDC150	-0.0361	-3.00786	Hypo	Down
CD3G	-0.1308	-3.96858	Hypo	Down
CDC25C	0.0704	-3.64731	Hyper	Down
CDC45	-0.0404	-2.84782	Hypo	Down
CDCA2	-0.0883	-3.61031	Hypo	Down
CDCA5	-0.04125	-4.39263	Hypo	Down
CDH11	0.00136	2.46825	Hyper	Up
CDH19	0.0992	3.37738	Hyper	Up
CDK6	-0.00665	-2.14423	Hypo	Down
CENPE	0.0436333	-3.87389	Hyper	Down
CENPF	-0.0684	-3.58167	Hypo	Down
CENPH	-0.05495	-2.85016	Hypo	Down
CENPK	-0.0509	-2.90949	Hypo	Down
CENPN	0.0783	-2.91638	Hyper	Down
CENPP	-0.00606667	-2.73508	Hypo	Down
CENPU	0.0156	-3.45427	Hyper	Down
CENPW	0.06805	-3.73776	Hyper	Down
CEP152	0.0515	-1.8764	Hyper	Down
CHAF1A	0.0348	-2.55678	Hyper	Down
CHL1	-0.11184	2.05843	Hypo	Up
CIP2A	-0.0236	-2.7122	Hypo	Down
CIT	-0.0462714	-3.41291	Hypo	Down
CKAP2	0.0509	-3.35488	Hyper	Down
CKAP2L	-0.0838	-3.13188	Hypo	Down
CLDN11	-0.0527	5.90854	Hypo	Up
CLEC2L	-0.0558	-3.76084	Hypo	Down
CLEC4D	-0.08965	5.55551	Hypo	Up
CLEC4E	-0.0618	3.41591	Hypo	Up
CNTNAP2	-0.0585288	-2.09029	Hypo	Down
CNTNAP5	-0.0693333	-4.15323	Hypo	Down
COBL	-0.0386545	3.31385	Hypo	Up
COL17A1	0.0047	-3.2998	Hyper	Down
COL6A5	-0.05575	2.41744	Hypo	Up
COLEC11	-0.04	3.33963	Hypo	Up
COMP	-0.052	6.11644	Hypo	Up
CP	0.0257	2.87859	Hyper	Up
CPA3	-0.0787	-2.10831	Hypo	Down
CPA6	-0.0412889	-3.31193	Hypo	Down
CPAMD8	-0.0894	2.49639	Hypo	Up
CPB2	-0.00485	-4.73473	Hypo	Down
CPNE4	-0.07586	-2.73303	Hypo	Down
CPNE6	-0.1005	7.72314	Hypo	Up
CPXM2	-0.07865	2.63866	Hypo	Up
CREB3L1	-0.042	2.76975	Hypo	Up
CREB5	-0.0488357	2.19113	Hypo	Up
CRHBP	0.03675	3.41687	Hyper	Up
CRISPLD2	-0.072	2.14801	Hypo	Up
CSPG4	0.041	2.15871	Hyper	Up
CTNNA2	-0.0454545	5.80981	Hypo	Up
CTSV	-0.0157	-5.47339	Hypo	Down
CXCR2	0.0454	2.88419	Hyper	Up
CXHXorf57	-0.03225	-3.08682	Hypo	Down
CYP4X1	-0.0594	3.14708	Hypo	Up
CYTIP	-0.1039	-2.93852	Hypo	Down
CYTL1	0.0447	-4.68827	Hyper	Down
DACH2	0.00744	7.93201	Hyper	Up
DCN	-0.0439	1.9401	Hypo	Up
DCSTAMP	-0.0899	-5.57103	Hypo	Down
DDX11	0.0615	-2.99556	Hyper	Down
DEPDC1	-0.0202	-4.79162	Hypo	Down
DEPDC1B	0.0134	-4.08518	Hyper	Down
DIAPH3	0.0101667	-3.22623	Hyper	Down
DLEU7	-0.0900333	-2.38574	Hypo	Down
DLGAP5	0.02195	-4.88586	Hyper	Down
DNA2	0.0549	-2.40011	Hyper	Down
DNASE1L3	-0.0885667	-2.69128	Hypo	Down
DNTT	-0.04785	-5.75022	Hypo	Down
DOCK6	-0.0258	2.06095	Hypo	Up
DOK6	-0.0435222	3.4745	Hypo	Up
DPYSL3	0.02965	1.95002	Hyper	Up
DSCC1	-0.0821	-6.72673	Hypo	Down
DTL	-0.0224	-3.13117	Hypo	Down
DTNA	-0.007625	3.60024	Hypo	Up
DUSP26	-0.0401	3.30763	Hypo	Up
DYNC1I1	-0.0170167	3.49794	Hypo	Up
DYSF	-0.0555556	2.14883	Hypo	Up
E2F7	0.032	-4.63592	Hyper	Down
E2F8	0.151	-3.63093	Hyper	Down
EDIL3	-0.06336	5.65513	Hypo	Up
EFEMP1	0.03935	1.99116	Hyper	Up
ELN	-0.0516	2.70552	Hypo	Up
EME1	-0.0417	-2.11488	Hypo	Down
ENPEP	-0.075	-1.89514	Hypo	Down
ENSMMUG00000000758	-0.0558	2.36663	Hypo	Up
ENSMMUG00000001854	-0.0384	-7.94783	Hypo	Down
ENSMMUG00000003289	0.0085	2.01635	Hyper	Up
ENSMMUG00000003563	-0.0529	4.30027	Hypo	Up
ENSMMUG00000004094	-0.023025	-2.01966	Hypo	Down
ENSMMUG00000004318	0.0578	-3.00296	Hyper	Down
ENSMMUG00000004579	-0.01625	-2.68995	Hypo	Down
ENSMMUG00000006470	-0.307	2.57332	Hypo	Up
ENSMMUG00000012777	-0.0555533	3.66556	Hypo	Up
ENSMMUG00000013098	-0.08064	1.84061	Hypo	Up
ENSMMUG00000014404	-0.0541	3.00169	Hypo	Up
ENSMMUG00000014733	-0.0204857	-2.54648	Hypo	Down
ENSMMUG00000015572	-0.0086	5.34297	Hypo	Up
ENSMMUG00000018421	-0.087725	-5.46799	Hypo	Down
ENSMMUG00000020721	0.0113	-2.84116	Hyper	Down
ENSMMUG00000020920	-0.0699	-3.37717	Hypo	Down
ENSMMUG00000038528	0.110875	-3.23713	Hyper	Down
ENSMMUG00000039540	-0.03	-3.63751	Hypo	Down
ENSMMUG00000040072	-0.0804	6.13221	Hypo	Up
ENSMMUG00000040288	-0.0839	3.80328	Hypo	Up
ENSMMUG00000040347	0.1163	-4.43861	Hyper	Down
ENSMMUG00000040575	-0.0644	-3.51292	Hypo	Down
ENSMMUG00000042104	-0.0887	-4.77583	Hypo	Down
ENSMMUG00000042558	-0.03615	7.88423	Hypo	Up
ENSMMUG00000042717	-0.0582	3.97884	Hypo	Up
ENSMMUG00000043098	-0.01735	-3.51374	Hypo	Down
ENSMMUG00000043141	-0.0364	-3.48116	Hypo	Down
ENSMMUG00000044197	-0.1141	3.22679	Hypo	Up
ENSMMUG00000045301	-0.1351	-3.9009	Hypo	Down
ENSMMUG00000045349	-0.0491	-6.06984	Hypo	Down
ENSMMUG00000045497	-0.0366	1.85383	Hypo	Up
ENSMMUG00000045876	-0.0969	-4.48143	Hypo	Down
ENSMMUG00000046231	-0.0512	-2.95971	Hypo	Down
ENSMMUG00000046375	0.088	7.82874	Hyper	Up
ENSMMUG00000048479	-0.0914	7.78627	Hypo	Up
ERBB4	-0.0283484	4.01379	Hypo	Up
ERCC6L	-0.0586	-4.04732	Hypo	Down
ESPL1	-0.09395	-2.41355	Hypo	Down
EXO1	-0.02785	-5.09734	Hypo	Down
EZH2	-0.0645667	-3.56702	Hypo	Down
F13A1	-0.0932429	2.54635	Hypo	Up
FAM129A	-0.07482	1.84566	Hypo	Up
FAM163A	0.0433	-2.62467	Hyper	Down
FANCD2	-0.03465	-1.90889	Hypo	Down
FANCI	-0.0565	-2.37237	Hypo	Down
FBLIM1	0.0322	2.38805	Hyper	Up
FBLN1	-0.08152	2.98683	Hypo	Up
FBLN2	0.0439	2.12691	Hyper	Up
FBLN5	-0.005825	1.76913	Hypo	Up
FBN1	-0.0668333	1.8526	Hypo	Up
FBXO32	-0.0459	1.95897	Hypo	Up
FCN3	-0.0917	2.56933	Hypo	Up
FGF12	-0.0535381	3.22596	Hypo	Up
FGF2	-0.03445	2.04011	Hypo	Up
FGF7	-0.0731667	2.83368	Hypo	Up
FLNC	0.1358	3.19473	Hyper	Up
FLRT2	-0.09385	1.81403	Hypo	Up
FOSB	0.2408	3.06002	Hyper	Up
FOXP2	-0.054645	2.34934	Hypo	Up
FPR1	-0.0454	3.45117	Hypo	Up
FYB1	-0.0305429	-3.24821	Hypo	Down
GABRG2	-0.0376667	5.73839	Hypo	Up
GAD2	-0.120233	-2.90528	Hypo	Down
GAP43	0.03525	3.96631	Hyper	Up
GATA6	0.0246	3.23099	Hyper	Up
GEN1	-0.0196	-3.06428	Hypo	Down
GFRA2	0.1753	3.82237	Hyper	Up
GLYATL1B	0.01165	-2.22642	Hyper	Down
GMNN	-0.0342	-2.06858	Hypo	Down
GNA15	-0.1257	-2.54842	Hypo	Down
GRAP2	-0.1025	-3.72545	Hypo	Down
GRB10	-0.0318385	1.96745	Hypo	Up
GRIK2	-0.10182	3.35679	Hypo	Up
GRIK3	-0.112267	3.08238	Hypo	Up
GSN	-0.0483	2.11181	Hypo	Up
GTSE1	-0.0352	-4.01818	Hypo	Down
GUCY2F	-0.1489	-8.02565	Hypo	Down
HAPLN1	-0.0314	6.47442	Hypo	Up
HAS2	-0.1249	2.47082	Hypo	Up
HELLS	0.0352	-2.89698	Hyper	Down
HIST2H2BF	0.0286	-2.82196	Hyper	Down
HIVEP3	-0.0564333	-2.39397	Hypo	Down
HJURP	-0.0633	-3.88376	Hypo	Down
HMGA2	-0.0667571	-4.61237	Hypo	Down
HMMR	0.1019	-4.13287	Hyper	Down
HRASLS	0.0335	2.54031	Hyper	Up
HSPB7	-0.1376	6.15905	Hypo	Up
HTRA3	0.01465	2.75593	Hyper	Up
ILDR2	-0.00375	-2.68807	Hypo	Down
INCENP	-0.0712	-2.3924	Hypo	Down
IQCD	0.0392	-2.64364	Hyper	Down
ITGA2B	0.0369	3.67658	Hyper	Up
ITGA8	-0.0165333	1.98455	Hypo	Up
ITGB3BP	-0.03	-2.14246	Hypo	Down
ITIH5	0.1909	2.06807	Hyper	Up
KANK2	-0.0582	2.32994	Hypo	Up
KCNJ3	-0.02205	7.4526	Hypo	Up
KCNS2	0.0173	3.94756	Hyper	Up
KCNT1	-0.0094	7.34122	Hypo	Up
KIF11	0.0169	-4.13536	Hyper	Down
KIF14	-0.02766	-4.76541	Hypo	Down
KIF15	0.0381	-4.5666	Hyper	Down
KIF18A	0.1202	-4.00814	Hyper	Down
KIF20B	-0.02045	-2.82087	Hypo	Down
KIF23	0.0237	-3.83461	Hyper	Down
KIF24	0.0976	-3.72735	Hyper	Down
KIF2C	0.0614	-4.11405	Hyper	Down
KIFC1	0.0822	-3.61428	Hyper	Down
KNL1	-0.0163667	-4.10987	Hypo	Down
KNTC1	0.04706	-3.73619	Hyper	Down
KRT14	-0.0937	-5.15325	Hypo	Down
LARP6	-0.0242	4.65751	Hypo	Up
LCK	0.0497333	-3.64952	Hyper	Down
LCT	-0.070275	-4.14096	Hypo	Down
LEF1	-0.01236	-4.97255	Hypo	Down
LEPR	-0.11185	2.77485	Hypo	Up
LIG1	-0.017	-2.82815	Hypo	Down
LILRB4	0.1689	-5.33872	Hyper	Down
LMNB1	0.00342	-3.45239	Hyper	Down
LMOD1	-0.0632	2.45351	Hypo	Up
LNX1	-0.076475	10.3411	Hypo	Up
LRP1	-0.0102	2.01641	Hypo	Up
LRR1	0.0482	-2.16236	Hyper	Down
LTBP1	-0.03716	2.22414	Hypo	Up
LYVE1	-0.1229	2.59631	Hypo	Up
MAGI2	-0.0453718	2.38262	Hypo	Up
MCM2	-0.0691	-2.65014	Hypo	Down
MCM4	0.059	-2.12152	Hyper	Down
MDGA2	-0.0804813	4.43463	Hypo	Up
MELK	-0.1257	-4.45138	Hypo	Down
MFAP4	-0.1862	2.29398	Hypo	Up
MGAM	-0.0019	3.2681	Hypo	Up
MIS18BP1	0.0307	-2.24029	Hyper	Down
MLIP	-0.0257	4.59954	Hypo	Up
MMS22L	0.0162	-2.66877	Hyper	Down
MPHOSPH9	-0.0265	-2.14247	Hypo	Down
MROH2A	-0.0201	-2.57268	Hypo	Down
MRVI1	-0.00236667	2.24332	Hypo	Up
MUC3A	-0.0927	-6.42506	Hypo	Down
MYBL1	-0.0535	-2.7925	Hypo	Down
MYBL2	-0.0292	-4.14294	Hypo	Down
MYBPC3	-0.0695	5.04563	Hypo	Up
MYH11	-0.0953429	2.43802	Hypo	Up
MYH7	-0.10745	6.10397	Hypo	Up
MYH7B	-0.153	2.70261	Hypo	Up
MYH8	-0.0482	-2.53433	Hypo	Down
MYL4	-0.0413	5.32814	Hypo	Up
MYOC	0.0599	2.30217	Hyper	Up
MYOCD	0.0301	3.50839	Hyper	Up
MYOM3	-0.07725	4.72455	Hypo	Up
MYRIP	-0.00487778	2.38934	Hypo	Up
NALCN	-0.0632286	3.74862	Hypo	Up
NCAM1	-0.077	3.1658	Hypo	Up
NCAPG2	0.0477	-2.5614	Hyper	Down
NCAPH	0.1301	-3.09161	Hyper	Down
NDRG4	-0.0773333	2.94313	Hypo	Up
NECAB1	-0.116567	4.0973	Hypo	Up
NEIL3	0.041	-3.6384	Hyper	Down
NEK2	0.0178667	-4.60319	Hyper	Down
NGFR	-0.1138	2.34068	Hypo	Up
NID1	-0.0460333	1.90333	Hypo	Up
NOX4	-0.0627667	2.11588	Hypo	Up
NPR1	-0.0622	1.90589	Hypo	Up
NRCAM	0.003525	3.29007	Hyper	Up
NREP	-0.2032	-2.18183	Hypo	Down
NRXN1	-0.035763	2.65571	Hypo	Up
NSD2	-0.0741	-1.83293	Hypo	Down
NTRK3	-0.0618769	2.12982	Hypo	Up
NUF2	-0.0991	-4.229	Hypo	Down
NUSAP1	0.0216	-4.93677	Hyper	Down
NWD2	-0.114675	2.19163	Hypo	Up
OLFML2B	-0.0887	2.10669	Hypo	Up
OPALIN	0.0462	-4.28185	Hyper	Down
OSR1	0.1023	3.13666	Hyper	Up
OSR2	0.1653	2.71832	Hyper	Up
OTOG	-0.046	-4.31998	Hypo	Down
OXTR	0.0826	2.46953	Hyper	Up
PAPPA2	-0.0267	2.14924	Hypo	Up
PARPBP	0.0471	-4.99381	Hyper	Down
PARVG	-0.1345	-3.2463	Hypo	Down
PAX1	-0.07	-5.40948	Hypo	Down
PCNA	-0.0607	-2.8501	Hypo	Down
PCOLCE2	0.0206	2.4153	Hyper	Up
PCSK5	-0.0073	2.18767	Hypo	Up
PDGFRA	-0.00535	1.82976	Hypo	Up
PDPN	0.0185333	2.26736	Hyper	Up
PDYN	-0.0864	-4.83225	Hypo	Down
PDZRN3	-0.0667714	2.4117	Hypo	Up
PHF24	-0.0555667	3.22692	Hypo	Up
PHLDB2	-0.06905	2.057	Hypo	Up
PKHD1L1	-0.0749875	2.17042	Hypo	Up
PLBD1	0.05	1.89021	Hyper	Up
PLCXD3	-0.0337667	2.82104	Hypo	Up
PLEK2	-0.17065	-3.37205	Hypo	Down
PLEKHA4	-0.06535	2.55625	Hypo	Up
PLXNA4	3.17e-17	2.88382	Hyper	Up
PMFBP1	-0.00795	-2.79287	Hypo	Down
PMP22	-0.0579	2.19706	Hypo	Up
PODN	0.0445	2.38789	Hyper	Up
POLE	-0.0295	-3.0184	Hypo	Down
POLE2	-0.0236	-2.46081	Hypo	Down
POLQ	-0.0859	-3.17173	Hypo	Down
PPBP	-0.0318	3.2485	Hypo	Up
PPP2R2B	-0.0428643	2.54249	Hypo	Up
PRC1	0.00975	-3.0136	Hyper	Down
PROK2	0.1137	8.79974	Hyper	Up
PROX1	-0.09965	2.73277	Hypo	Up
PRR11	0.0372	-2.11495	Hyper	Down
PRUNE2	-0.069825	2.64719	Hypo	Up
PSAT1	-0.05705	-2.37501	Hypo	Down
PTPN7	-0.0454	-3.67753	Hypo	Down
RAB3C	-0.09834	2.41571	Hypo	Up
RAD51AP1	-0.0096	-4.11453	Hypo	Down
RAD54L	0.0169	-3.47096	Hyper	Down
RARA	-0.04715	1.98743	Hypo	Up
RDM1	-0.01655	-5.62895	Hypo	Down
RGS6	-0.0725467	2.49295	Hypo	Up
RNASEH2B	0.0714333	-2.57129	Hyper	Down
RPE65	-0.0959	-3.36837	Hypo	Down
RRM2	-0.0867	-3.60031	Hypo	Down
RTKN2	-0.0234333	-3.24848	Hypo	Down
RUNX1T1	-0.1002	1.98119	Hypo	Up
SCARA5	-0.03855	3.39996	Hypo	Up
SCHIP1	-0.0705	2.95424	Hypo	Up
SCML2	-0.14455	-1.93183	Hypo	Down
SCUBE1	-0.08905	3.23894	Hypo	Up
SKA1	-0.03275	-4.28679	Hypo	Down
SKA3	-0.0369	-3.82226	Hypo	Down
SLC16A12	-0.0799	3.61944	Hypo	Up
SLC2A14	0.0140667	3.93356	Hyper	Up
SLC38A8	0.0975333	-4.61852	Hyper	Down
SLC6A4	0.1389	2.41319	Hyper	Up
SLC7A14	-0.0129	5.55234	Hypo	Up
SLC8A3	-0.100975	-5.54073	Hypo	Down
SLIT1	-0.083625	-3.8279	Hypo	Down
SMC4	0.005	-2.54356	Hyper	Down
SNTA1	-0.1514	3.38419	Hypo	Up
SOD3	-0.023	3.19119	Hypo	Up
SPAG5	-0.0288	-2.50049	Hypo	Down
SPARCL1	-0.0669	1.78977	Hypo	Up
SPDL1	0.0128	-2.00655	Hyper	Down
SPP1	0.02945	3.47405	Hyper	Up
SRPX2	-0.0392	3.15848	Hypo	Up
ST3GAL6	-0.0334	-1.81906	Hypo	Down
STAC	-0.0657714	2.5207	Hypo	Up
STEAP4	-0.0446	2.26144	Hypo	Up
STMN1	-0.0451	-3.90111	Hypo	Down
SULF1	0.0196	2.19413	Hyper	Up
SULT4A1	-0.101533	3.84278	Hypo	Up
SVEP1	-0.0702571	1.98974	Hypo	Up
SVOPL	-0.0640667	-5.19003	Hypo	Down
SYT1	-0.0280846	3.2415	Hypo	Up
TACC3	0.02255	-3.27895	Hyper	Down
TBCD	0.131367	-2.13149	Hyper	Down
TBX18	0.025	2.26923	Hyper	Up
TBX5	0.0532	3.0027	Hyper	Up
TCF7	0.01765	-4.60695	Hyper	Down
TENM1	-0.0189667	-2.18482	Hypo	Down
TERT	-0.0821	-5.97712	Hypo	Down
TFDP2	-0.0159857	-2.14754	Hypo	Down
TGFBR3	0.1543	1.79821	Hyper	Up
THBS4	-0.080625	3.32749	Hypo	Up
THEGL	0.00366667	-8.26015	Hyper	Down
THEMIS	-0.0686	-4.0338	Hypo	Down
THSD7A	-0.069575	2.34715	Hypo	Up
TICRR	-0.0077	-5.52949	Hypo	Down
TIMELESS	-0.0786	-2.21591	Hypo	Down
TK1	-0.0928667	-2.49944	Hypo	Down
TMC3	-0.0577	9.12135	Hypo	Up
TMC5	-0.1063	3.17113	Hypo	Up
TMEM131L	0.01285	-1.86265	Hyper	Down
TMOD1	-0.0111	3.36175	Hypo	Up
TMPO	-0.0594667	-2.37899	Hypo	Down
TNFRSF19	0.0041	2.18118	Hyper	Up
TPX2	-0.0261	-3.81267	Hypo	Down
TRAIP	0.0185	-2.58604	Hyper	Down
TRBV10-2	-0.0512	-5.27233	Hypo	Down
TRHDE	-0.09102	2.68762	Hypo	Up
TRIM59	-0.077	-2.88762	Hypo	Down
TRIM72	-0.06	3.27787	Hypo	Up
TRPC4	0.01175	2.9429	Hyper	Up
TTK	-0.0864	-4.59314	Hypo	Down
TUBB4A	-0.1446	3.55725	Hypo	Up
TYMS	-0.05215	-3.27861	Hypo	Down
UBE2T	-0.0444	-3.34834	Hypo	Down
UNC13C	-0.0541071	3.69154	Hypo	Up
UNC5CL	-0.0482	-4.10842	Hypo	Down
USH1C	-0.046	-2.95862	Hypo	Down
VAT1L	0.0053	2.67133	Hyper	Up
VCAN	-0.06605	3.80449	Hypo	Up
WDHD1	0.0337667	-2.57355	Hyper	Down
WDR62	-0.0467	-2.87057	Hypo	Down
WDR76	-0.0428	-2.05828	Hypo	Down
WEE1	-0.0392	-2.28183	Hypo	Down
WNK4	-0.0265	2.22294	Hypo	Up
XIRP1	-0.0994	3.41517	Hypo	Up
ZCCHC24	-0.0121333	2.22117	Hypo	Up
ZGRF1	-0.124733	-3.80898	Hypo	Down
ZNF367	0.0992	-2.94833	Hyper	Down
ZNF732	0.1136	-9.60761	Hyper	Down
ZWILCH	0.1527	-1.9545	Hyper	Down
ZWINT	0.026	-3.75747	Hyper	Down

## Sheet: Table S8
Table S8. 37 promoters were unmethylated, including 25 promoters had no CpG context.
Chr	Gene_name	Strand	Biotype
1	CCDC181	+	protein_coding
1	ENSMMUG00000047012	-	lincRNA
1	ENSMMUG00000048987	-	protein_coding
1	LRIF1	-	protein_coding
1	mml-mir-215	+	miRNA
2	ENSMMUG00000048527	+	protein_coding
3	ELMO1	+	protein_coding
4	ENSMMUG00000010611	+	protein_coding
4	ENSMMUG00000047194	-	lincRNA
4	HIST1H3D	+	protein_coding
4	RF00399	+	snoRNA
4	SNX14	-	protein_coding
5	RF00026	+	snoRNA
5	RF00026	+	snoRNA
5	RF00072	-	snoRNA
6	ENSMMUG00000037616	+	pseudogene
6	ENSMMUG00000042697	+	protein_coding
6	RF00100	+	snoRNA
7	TTC23	-	protein_coding
8	ENSMMUG00000039639	+	miRNA
8	ENSMMUG00000041503	+	lincRNA
8	RF00026	+	snoRNA
9	ENSMMUG00000019677	-	protein_coding
9	ENSMMUG00000042906	+	protein_coding
9	ENSMMUG00000044792	+	miRNA
9	RF00019	+	snoRNA
9	RF00096	-	snoRNA
9	RPP30	+	protein_coding
10	CDH26	-	protein_coding
11	ENSMMUG00000042836	-	lincRNA
12	ENSMMUG00000004825	+	protein_coding
12	ENSMMUG00000018822	-	protein_coding
12	PPIG	+	protein_coding
12	RF00096	+	snoRNA
12	RF01985	+	snoRNA
14	ENSMMUG00000021341	+	protein_coding
17	ENSMMUG00000049157	+	miRNA

## Sheet: Table S9
Table S9. 557 promoters were heterogeneously methylated.
Chr	Gene_name	Strand	Biotype
1	ATP6V1G3	+	protein_coding
1	C1orf158	+	protein_coding
1	CRB1	-	protein_coding
1	DNAJC8	-	protein_coding
1	EGLN1	-	protein_coding
1	ENSMMUG00000008270	+	protein_coding
1	ENSMMUG00000008515	+	protein_coding
1	ENSMMUG00000011539	-	protein_coding
1	ENSMMUG00000021090	+	protein_coding
1	ENSMMUG00000021266	+	protein_coding
1	ENSMMUG00000033915	+	miRNA
1	ENSMMUG00000038040	+	protein_coding
1	ENSMMUG00000038347	+	lincRNA
1	ENSMMUG00000038360	+	miRNA
1	ENSMMUG00000039595	+	protein_coding
1	ENSMMUG00000040257	-	lincRNA
1	ENSMMUG00000040425	+	lincRNA
1	ENSMMUG00000041737	+	protein_coding
1	ENSMMUG00000042871	-	protein_coding
1	ENSMMUG00000043667	+	lincRNA
1	ENSMMUG00000044015	-	lincRNA
1	ENSMMUG00000044137	-	miRNA
1	ENSMMUG00000044188	-	protein_coding
1	ENSMMUG00000044338	-	lincRNA
1	ENSMMUG00000045497	-	protein_coding
1	ENSMMUG00000045932	+	lincRNA
1	ENSMMUG00000045961	+	lincRNA
1	ENSMMUG00000045975	+	processed_pseudogene
1	ENSMMUG00000047765	+	protein_coding
1	ENSMMUG00000048099	+	protein_coding
1	FMO2	-	protein_coding
1	IL10	+	protein_coding
1	IL23R	+	snoRNA
1	KMO	+	protein_coding
1	MSH4	+	protein_coding
1	OR2M4	-	protein_coding
1	PRG4	-	protein_coding
1	PYHIN1	+	protein_coding
1	RF00001	+	snoRNA
1	RF00001	-	snoRNA
1	RF00019	-	snoRNA
1	RF00020	+	snoRNA
1	RF00026	+	snoRNA
1	RF00026	-	snoRNA
1	RF00066	-	snoRNA
1	RF00152	+	snoRNA
1	RYR2	+	protein_coding
1	SELE	+	protein_coding
1	SH2D1B	-	protein_coding
1	SPRR2G	-	protein_coding
1	SPTA1	-	protein_coding
1	ST6GALNAC5	+	protein_coding
1	TAF1A	+	protein_coding
1	TCHH	-	protein_coding
1	TIMM17A	-	protein_coding
1	USP33	-	protein_coding
2	BCHE	+	protein_coding
2	BTLA	-	protein_coding
2	COL6A5	-	protein_coding
2	DHFR2	-	protein_coding
2	DRD3	-	protein_coding
2	ENSMMUG00000010752	-	protein_coding
2	ENSMMUG00000031115	+	protein_coding
2	ENSMMUG00000038171	+	lincRNA
2	ENSMMUG00000042301	-	miRNA
2	ENSMMUG00000043287	-	lincRNA
2	ENSMMUG00000044232	+	miRNA
2	ENSMMUG00000045927	-	lincRNA
2	ENSMMUG00000045977	+	lincRNA
2	ENSMMUG00000046095	+	lincRNA
2	ENSMMUG00000046312	+	lincRNA
2	ENSMMUG00000046497	-	protein_coding
2	ENSMMUG00000047895	+	protein_coding
2	ENSMMUG00000047982	-	lincRNA
2	ENSMMUG00000048769	-	lincRNA
2	ENSMMUG00000048827	-	lincRNA
2	GPR15	+	protein_coding
2	OSTN	+	protein_coding
2	RF00026	-	snoRNA
2	RF00026	+	snoRNA
2	RF00026	+	snoRNA
2	RF00026	+	snoRNA
2	RF00026	-	snoRNA
2	RF00066	+	snoRNA
2	RF00342	+	snoRNA
2	SI	+	protein_coding
2	SLC9A9	+	protein_coding
2	STT3B	-	protein_coding
2	TFG	+	protein_coding
2	TMEM212	-	protein_coding
3	AGR3	-	protein_coding
3	CYP3A43	+	protein_coding
3	DOCK4	-	protein_coding
3	DYRK1A	-	protein_coding
3	ENSMMUG00000001140	+	protein_coding
3	ENSMMUG00000011916	-	protein_coding
3	ENSMMUG00000014971	+	protein_coding
3	ENSMMUG00000021075	-	protein_coding
3	ENSMMUG00000023347	+	protein_coding
3	ENSMMUG00000033320	-	miRNA
3	ENSMMUG00000038263	-	lincRNA
3	ENSMMUG00000039989	-	protein_coding
3	ENSMMUG00000043991	-	lincRNA
3	ENSMMUG00000045381	-	lincRNA
3	ENSMMUG00000046779	+	lincRNA
3	ENSMMUG00000046846	-	miRNA
3	ENSMMUG00000048403	+	lincRNA
3	ENSMMUG00000048581	-	lincRNA
3	GNAI1	-	protein_coding
3	GPR85	-	protein_coding
3	LIPI	+	protein_coding
3	LRRD1	-	protein_coding
3	MGAM2	+	protein_coding
3	mml-mir-6133	+	miRNA
3	NRIP1	+	protein_coding
3	POM121L12	+	protein_coding
3	RF00001	-	snoRNA
3	RF00004	-	snoRNA
3	RF00015	-	snoRNA
3	RF00017	+	snoRNA
3	RF00026	-	snoRNA
3	RF00026	-	snoRNA
3	RF00100	+	snoRNA
3	RF00136	+	snoRNA
3	RF00394	+	snoRNA
3	SPAM1	+	protein_coding
3	TMEM196	+	protein_coding
3	VPS41	+	protein_coding
4	DEFB113	-	protein_coding
4	DEFB114	-	protein_coding
4	ENSMMUG00000001925	-	protein_coding
4	ENSMMUG00000010024	+	protein_coding
4	ENSMMUG00000020417	-	protein_coding
4	ENSMMUG00000029616	-	protein_coding
4	ENSMMUG00000033990	+	miRNA
4	ENSMMUG00000037907	+	miRNA
4	ENSMMUG00000039258	+	protein_coding
4	ENSMMUG00000039404	+	lincRNA
4	ENSMMUG00000040420	-	lincRNA
4	ENSMMUG00000042167	+	lincRNA
4	ENSMMUG00000042735	+	lincRNA
4	ENSMMUG00000042744	-	lincRNA
4	ENSMMUG00000043483	-	lincRNA
4	ENSMMUG00000044900	+	miRNA
4	ENSMMUG00000045152	+	miRNA
4	ENSMMUG00000045295	+	lincRNA
4	ENSMMUG00000046121	+	lincRNA
4	ENSMMUG00000046125	+	protein_coding
4	ENSMMUG00000046450	-	lincRNA
4	ENSMMUG00000047648	+	lincRNA
4	ENSMMUG00000048441	-	lincRNA
4	EYA4	-	protein_coding
4	GPRC6A	+	protein_coding
4	LGSN	-	protein_coding
4	mml-mir-30a	-	miRNA
4	OR14J1	+	protein_coding
4	PLG	+	protein_coding
4	PM20D2	+	protein_coding
4	PNISR	-	protein_coding
4	RF00004	+	snoRNA
4	RF00026	+	snoRNA
4	RF00026	+	snoRNA
4	RF00026	-	snoRNA
4	RF00026	-	snoRNA
4	RF00026	+	snoRNA
4	RF00026	+	snoRNA
4	RF00561	+	snoRNA
4	RUNX2	+	protein_coding
4	SLC17A3	-	protein_coding
4	SLC17A4	+	protein_coding
4	SLC26A8	-	protein_coding
4	TAAR6	-	protein_coding
4	VIP	-	protein_coding
5	AMTN	-	protein_coding
5	CLDN22	-	protein_coding
5	CSN2	+	protein_coding
5	ENSMMUG00000001011	+	processed_pseudogene
5	ENSMMUG00000017961	+	protein_coding
5	ENSMMUG00000030183	-	processed_pseudogene
5	ENSMMUG00000033891	+	miRNA
5	ENSMMUG00000039225	+	lincRNA
5	ENSMMUG00000039241	-	protein_coding
5	ENSMMUG00000039277	-	protein_coding
5	ENSMMUG00000040764	-	protein_coding
5	ENSMMUG00000041614	+	miRNA
5	ENSMMUG00000042918	+	lincRNA
5	ENSMMUG00000043156	+	protein_coding
5	ENSMMUG00000043545	+	protein_coding
5	ENSMMUG00000044039	+	lincRNA
5	ENSMMUG00000044400	+	lincRNA
5	ENSMMUG00000044789	+	lincRNA
5	ENSMMUG00000044873	-	lincRNA
5	ENSMMUG00000045264	-	lincRNA
5	ENSMMUG00000045781	+	lincRNA
5	ENSMMUG00000046506	+	protein_coding
5	ENSMMUG00000047058	-	protein_coding
5	ENSMMUG00000047814	+	lincRNA
5	ENSMMUG00000048972	-	lincRNA
5	ENSMMUG00000049081	+	miRNA
5	ENSMMUG00000049260	-	lincRNA
5	GBA3	+	protein_coding
5	JCHAIN	+	protein_coding
5	MMRN1	+	protein_coding
5	PLAC8	+	snoRNA
5	RF00003	+	snoRNA
5	RF00015	+	snoRNA
5	RF00017	-	snoRNA
5	RF00017	-	snoRNA
5	RF00019	+	snoRNA
5	RF00019	-	snoRNA
5	RF00026	+	snoRNA
5	RF00026	-	snoRNA
5	RF00026	+	snoRNA
5	RF00026	+	snoRNA
5	RF00026	-	snoRNA
5	RF00066	+	snoRNA
5	RF00571	-	snoRNA
5	TECRL	+	protein_coding
5	UGT2B33	+	protein_coding
5	ZNF827	-	protein_coding
6	CD14	-	protein_coding
6	DAB2	-	protein_coding
6	DPYSL3	-	protein_coding
6	ENSMMUG00000007075	-	protein_coding
6	ENSMMUG00000014571	+	protein_coding
6	ENSMMUG00000021941	+	protein_coding
6	ENSMMUG00000030135	-	protein_coding
6	ENSMMUG00000033644	+	miRNA
6	ENSMMUG00000033828	-	miRNA
6	ENSMMUG00000034102	-	miRNA
6	ENSMMUG00000037762	+	lincRNA
6	ENSMMUG00000039594	+	lincRNA
6	ENSMMUG00000040793	-	lincRNA
6	ENSMMUG00000041610	+	miRNA
6	ENSMMUG00000042872	-	lincRNA
6	ENSMMUG00000043163	-	lincRNA
6	ENSMMUG00000045391	+	lincRNA
6	ENSMMUG00000047257	+	lincRNA
6	ENSMMUG00000047322	-	protein_coding
6	ENSMMUG00000049239	-	lincRNA
6	FBXO4	+	protein_coding
6	GIN1	-	protein_coding
6	HMHB1	+	protein_coding
6	IL9	-	protein_coding
6	LYSMD3	-	protein_coding
6	NME5	-	protein_coding
6	PCDHA13	+	protein_coding
6	PCDHA9	+	protein_coding
6	PCDHB14	+	protein_coding
6	RF00001	+	snoRNA
6	RF00001	+	snoRNA
6	RF00017	-	snoRNA
6	RF00019	+	snoRNA
6	RF00026	-	snoRNA
6	RF00026	+	snoRNA
6	RF00026	-	snoRNA
6	RF00026	+	snoRNA
6	RF00100	+	snoRNA
6	RF00100	-	snoRNA
6	RF00100	+	snoRNA
6	RF00156	+	snoRNA
7	CCNB1IP1	-	protein_coding
7	CEP152	-	protein_coding
7	ENSMMUG00000014743	+	protein_coding
7	ENSMMUG00000041822	+	protein_coding
7	ENSMMUG00000043828	+	miRNA
7	ENSMMUG00000045854	-	miRNA
7	ENSMMUG00000045896	-	lincRNA
7	ENSMMUG00000046492	+	lincRNA
7	ENSMMUG00000046580	-	protein_coding
7	ENSMMUG00000047556	-	lincRNA
7	ENSMMUG00000048115	+	protein_coding
7	ENSMMUG00000048422	+	protein_coding
7	OR4K15	-	protein_coding
7	OR4L1	-	protein_coding
7	RCN2	+	protein_coding
7	RD3L	-	protein_coding
7	RF00017	+	snoRNA
7	RF00019	-	snoRNA
7	RF00026	+	snoRNA
7	RF00026	-	snoRNA
7	RF00100	+	snoRNA
7	RF00108	+	snoRNA
7	RF00181	+	snoRNA
7	RF00425	-	snoRNA
7	RF02191	+	snoRNA
7	TRAV29DV5	+	protein_coding
7	TRAV36DV7	+	protein_coding
7	TRAV9-2	+	protein_coding
7	UBE3A	-	protein_coding
8	ADAM28	+	protein_coding
8	ADAMDEC1	+	protein_coding
8	CALB1	-	protein_coding
8	ENSMMUG00000021588	-	protein_coding
8	ENSMMUG00000028934	-	processed_pseudogene
8	ENSMMUG00000029037	+	protein_coding
8	ENSMMUG00000039407	-	lincRNA
8	ENSMMUG00000039706	-	lincRNA
8	ENSMMUG00000040588	-	lincRNA
8	ENSMMUG00000042433	+	lincRNA
8	ENSMMUG00000044711	+	lincRNA
8	ENSMMUG00000045809	+	protein_coding
8	ENSMMUG00000046427	+	lincRNA
8	ENSMMUG00000046964	+	lincRNA
8	ENSMMUG00000047354	+	lincRNA
8	ENSMMUG00000047619	+	lincRNA
8	ENSMMUG00000048249	+	lincRNA
8	PCMTD1	+	protein_coding
8	RF00001	+	snoRNA
8	RF00004	-	snoRNA
8	RF00017	+	snoRNA
8	RF00019	+	snoRNA
8	RF00019	+	snoRNA
8	RF00100	+	snoRNA
8	RF00212	-	snoRNA
8	RNF170	+	protein_coding
8	SLC10A5	-	protein_coding
8	SPIDR	+	protein_coding
8	TMEM71	-	protein_coding
8	ZMAT4	-	protein_coding
8	ZNF596	+	protein_coding
9	CTNNA3	+	protein_coding
9	ENSMMUG00000037951	-	lincRNA
9	ENSMMUG00000040493	-	lincRNA
9	ENSMMUG00000040958	-	protein_coding
9	ENSMMUG00000042571	-	protein_coding
9	ENSMMUG00000042609	+	protein_coding
9	ENSMMUG00000043665	-	protein_coding
9	ENSMMUG00000044214	+	lincRNA
9	ENSMMUG00000044598	+	protein_coding
9	ENSMMUG00000044779	+	protein_coding
9	ENSMMUG00000044920	-	lincRNA
9	ENSMMUG00000046510	-	lincRNA
9	ENSMMUG00000047021	+	protein_coding
9	HNRNPH3	-	protein_coding
9	PNLIP	+	protein_coding
9	PRKCQ	-	protein_coding
9	RF00017	+	snoRNA
9	RF00019	-	snoRNA
9	RF00026	+	snoRNA
9	RF00026	-	snoRNA
9	RF00026	-	snoRNA
9	RF00026	+	snoRNA
9	RF01299	+	snoRNA
9	SGPL1	-	protein_coding
9	USP6NL	-	protein_coding
10	DEFB115	-	protein_coding
10	ENSMMUG00000043734	+	miRNA
10	ENSMMUG00000044650	-	lincRNA
10	OTOR	+	protein_coding
10	RF00017	+	snoRNA
10	RF02171	+	snoRNA
10	WFDC10B	+	protein_coding
10	ZNFX1	+	protein_coding
11	ADGRD1	+	protein_coding
11	C12orf50	-	protein_coding
11	CD163L1	-	protein_coding
11	CLEC7A	-	protein_coding
11	ENSMMUG00000013570	-	protein_coding
11	ENSMMUG00000032716	-	miRNA
11	ENSMMUG00000032804	-	miRNA
11	ENSMMUG00000037543	-	lincRNA
11	ENSMMUG00000039000	-	lincRNA
11	ENSMMUG00000040708	-	lincRNA
11	ENSMMUG00000043355	-	lincRNA
11	ENSMMUG00000043404	+	protein_coding
11	ENSMMUG00000045316	+	lincRNA
11	ENSMMUG00000045658	+	lincRNA
11	ENSMMUG00000046014	+	lincRNA
11	ENSMMUG00000046686	-	lincRNA
11	ENSMMUG00000047057	+	miRNA
11	ENSMMUG00000048061	+	lincRNA
11	ENSMMUG00000048811	-	protein_coding
11	KLRF2	+	protein_coding
11	MRPL42	+	protein_coding
11	NKG2D	-	protein_coding
11	OR6C76	+	protein_coding
11	PLBD1	-	protein_coding
11	PPFIA2	-	protein_coding
11	RF00001	+	snoRNA
11	RF00019	+	snoRNA
11	RF00019	+	snoRNA
11	RF00026	-	snoRNA
11	RF00026	-	snoRNA
11	RF00026	+	snoRNA
11	RF00066	+	snoRNA
11	RF00066	-	snoRNA
11	RF00100	-	snoRNA
11	RF00275	-	snoRNA
11	RF00537	-	snoRNA
11	RF00618	+	snoRNA
11	RF01969	+	snoRNA
11	RF01970	+	snoRNA
11	SLCO1B1	+	protein_coding
12	ENSMMUG00000010691	+	protein_coding
12	ENSMMUG00000033562	-	miRNA
12	ENSMMUG00000039941	-	lincRNA
12	ENSMMUG00000040030	+	lincRNA
12	ENSMMUG00000041501	+	lincRNA
12	ENSMMUG00000042063	-	protein_coding
12	ENSMMUG00000042646	-	lincRNA
12	ENSMMUG00000043365	-	miRNA
12	ENSMMUG00000043451	+	lincRNA
12	ENSMMUG00000043984	+	lincRNA
12	ENSMMUG00000044797	-	protein_coding
12	ENSMMUG00000047216	+	lincRNA
12	ENSMMUG00000047878	+	lincRNA
12	ENSMMUG00000048236	+	protein_coding
12	ENSMMUG00000049197	-	lincRNA
12	EPHA4	-	protein_coding
12	KYNU	+	protein_coding
12	MAP2	+	protein_coding
12	PIKFYVE	+	protein_coding
12	RESP18	-	protein_coding
12	RF00001	-	snoRNA
12	RF00001	+	snoRNA
12	RF00019	+	snoRNA
12	RF00026	+	snoRNA
12	RF00026	+	snoRNA
12	RF00026	-	snoRNA
12	RF00100	+	snoRNA
12	RF00275	-	snoRNA
12	RF01992	+	snoRNA
12	TFPI	-	protein_coding
13	C2orf16	+	protein_coding
13	ENSMMUG00000003528	+	protein_coding
13	ENSMMUG00000038592	-	lincRNA
13	ENSMMUG00000042977	-	protein_coding
13	ENSMMUG00000042982	-	lincRNA
13	ENSMMUG00000043437	+	lincRNA
13	ENSMMUG00000045797	+	miRNA
13	ENSMMUG00000047803	-	lincRNA
13	ENSMMUG00000048402	-	protein_coding
13	LRRTM4	-	protein_coding
13	RF00026	+	snoRNA
13	SLC9A4	+	protein_coding
14	ANAPC15	-	protein_coding
14	BCO2	+	protein_coding
14	CASP12	-	protein_coding
14	EIF4G2	+	protein_coding
14	ENSMMUG00000014956	-	protein_coding
14	ENSMMUG00000031065	-	protein_coding
14	ENSMMUG00000035169	+	miRNA
14	ENSMMUG00000039680	-	lincRNA
14	ENSMMUG00000040360	-	lincRNA
14	ENSMMUG00000042802	+	lincRNA
14	ENSMMUG00000046371	+	lincRNA
14	ENSMMUG00000048032	-	protein_coding
14	ENSMMUG00000048974	-	protein_coding
14	ENSMMUG00000049252	-	protein_coding
14	GAS2	-	protein_coding
14	HBB	+	protein_coding
14	HBG2	+	protein_coding
14	HTR3B	+	protein_coding
14	MMP10	-	protein_coding
14	MS4A3	-	protein_coding
14	MS4A7	-	protein_coding
14	MUC15	+	protein_coding
14	NTM	+	protein_coding
14	OR4C11	+	protein_coding
14	OR4S2	-	protein_coding
14	OR51A7	-	protein_coding
14	OR51E2	+	protein_coding
14	OR52K2	-	protein_coding
14	OR8J1	-	protein_coding
14	OVCH2	+	protein_coding
14	RF00001	+	snoRNA
14	RF00019	+	snoRNA
14	RF00026	-	snoRNA
15	DIRAS2	-	protein_coding
15	ENSMMUG00000031992	+	protein_coding
15	ENSMMUG00000038028	+	lincRNA
15	ENSMMUG00000038192	+	lincRNA
15	ENSMMUG00000038670	+	lincRNA
15	ENSMMUG00000039345	+	lincRNA
15	ENSMMUG00000039352	+	lincRNA
15	ENSMMUG00000039902	+	lincRNA
15	ENSMMUG00000040205	-	miRNA
15	ENSMMUG00000040209	-	lincRNA
15	ENSMMUG00000042505	-	lincRNA
15	ENSMMUG00000044793	-	protein_coding
15	ENSMMUG00000046919	+	lincRNA
15	ENSMMUG00000047131	+	lincRNA
15	ENSMMUG00000047138	-	lincRNA
15	ENSMMUG00000048432	+	lincRNA
15	GNE	+	protein_coding
15	IFNA2	+	protein_coding
15	IFNA8	-	protein_coding
15	mml-let-7a-1	+	miRNA
15	mml-let-7f-1	+	miRNA
15	OGN	-	protein_coding
15	PBX3	-	protein_coding
15	RF00001	-	snoRNA
15	RF00017	+	snoRNA
15	RF00100	-	snoRNA
15	RF00100	+	snoRNA
15	RF02045	-	snoRNA
15	TDRD7	-	protein_coding
16	CD300E	-	protein_coding
16	DBF4B	+	protein_coding
16	ENSMMUG00000013587	-	protein_coding
16	ENSMMUG00000030389	-	protein_coding
16	ENSMMUG00000037581	-	protein_coding
16	ENSMMUG00000038277	-	miRNA
16	ENSMMUG00000039276	+	lincRNA
16	ENSMMUG00000046999	-	protein_coding
16	KRT24	-	protein_coding
16	KRT39	-	protein_coding
16	mml-mir-301a	+	miRNA
16	MYH1	-	protein_coding
16	PHB	+	protein_coding
16	RF00017	+	snoRNA
16	RF00026	-	snoRNA
16	TMIGD1	-	protein_coding
16	TOM1L2	-	protein_coding
17	ENSMMUG00000034118	-	miRNA
17	ENSMMUG00000039821	+	lincRNA
17	ENSMMUG00000040825	-	miRNA
17	ENSMMUG00000040954	-	lincRNA
17	ENSMMUG00000045330	+	protein_coding
17	mml-mir-19a	+	miRNA
17	mml-mir-20a	+	miRNA
17	NALCN	-	protein_coding
17	RF00001	+	snoRNA
17	RF00003	-	snoRNA
17	RF00100	-	snoRNA
17	RF02091	+	snoRNA
17	RFC3	+	protein_coding
17	SLITRK6	-	protein_coding
18	CDH19	-	protein_coding
18	CPLX4	-	protein_coding
18	CXXC1	-	protein_coding
18	ENSMMUG00000033686	+	miRNA
18	ENSMMUG00000038038	-	miRNA
18	ENSMMUG00000038139	-	lincRNA
18	ENSMMUG00000041321	+	miRNA
18	ENSMMUG00000044311	-	lincRNA
18	GALNT1	+	protein_coding
18	RF00015	+	snoRNA
18	RF00019	+	snoRNA
18	SYT4	-	protein_coding
19	ENSMMUG00000017111	-	protein_coding
19	ENSMMUG00000021467	+	protein_coding
19	ENSMMUG00000040891	-	protein_coding
19	ENSMMUG00000043431	-	lincRNA
19	ZNF14	-	protein_coding
19	ZNF486	+	protein_coding
20	ENSMMUG00000016031	+	protein_coding
20	ENSMMUG00000043303	+	lincRNA
20	ENSMMUG00000043672	+	lincRNA
20	ENSMMUG00000047972	+	lincRNA
20	RF00026	-	snoRNA
20	RF00100	-	snoRNA
20	TXNL4B	+	protein_coding
X	ENSMMUG00000032340	+	protein_coding
X	RF00100	-	snoRNA
X	RF00322	-	snoRNA

## Sheet: Table S10
Table S10. 678 promoters were hypermethylated.
Chr	Gene_name	Strand	Biotype
1	AKT3	-	protein_coding
1	ANGPTL3	+	protein_coding
1	CCDC18	+	protein_coding
1	CLK2	-	protein_coding
1	ENSMMUG00000006184	+	protein_coding
1	ENSMMUG00000012725	+	protein_coding
1	ENSMMUG00000016234	+	protein_coding
1	ENSMMUG00000033878	+	miRNA
1	ENSMMUG00000034014	+	miRNA
1	ENSMMUG00000038250	-	protein_coding
1	ENSMMUG00000038667	-	lincRNA
1	ENSMMUG00000040430	+	protein_coding
1	ENSMMUG00000040586	-	protein_coding
1	ENSMMUG00000040608	-	protein_coding
1	ENSMMUG00000040864	+	protein_coding
1	ENSMMUG00000040997	+	pseudogene
1	ENSMMUG00000041232	-	protein_coding
1	ENSMMUG00000041879	-	protein_coding
1	ENSMMUG00000042125	+	lincRNA
1	ENSMMUG00000042158	-	lincRNA
1	ENSMMUG00000042563	-	protein_coding
1	ENSMMUG00000043060	-	protein_coding
1	ENSMMUG00000043273	+	lincRNA
1	ENSMMUG00000043784	+	protein_coding
1	ENSMMUG00000044267	-	protein_coding
1	ENSMMUG00000044565	+	protein_coding
1	ENSMMUG00000045309	+	protein_coding
1	ENSMMUG00000045959	+	protein_coding
1	ENSMMUG00000046233	+	protein_coding
1	ENSMMUG00000046490	+	processed_pseudogene
1	ENSMMUG00000046785	+	lincRNA
1	ENSMMUG00000047959	-	protein_coding
1	ENSMMUG00000048112	+	lincRNA
1	ENSMMUG00000048881	+	miRNA
1	ENSMMUG00000048975	+	miRNA
1	EPS15	-	protein_coding
1	FAF1	-	protein_coding
1	FRRS1	-	protein_coding
1	GPSM2	+	protein_coding
1	HMGCS2	-	protein_coding
1	LEMD1	+	protein_coding
1	LRRC39	-	protein_coding
1	MAGI3	+	protein_coding
1	mml-mir-181a-1	+	miRNA
1	mml-mir-181b-1	+	miRNA
1	mml-mir-186	-	miRNA
1	NRAS	-	protein_coding
1	NTNG1	+	protein_coding
1	RF00001	-	snoRNA
1	RF00001	-	snoRNA
1	RF00001	+	snoRNA
1	RF00015	-	snoRNA
1	RF00017	-	snoRNA
1	RF00017	+	snoRNA
1	RF00017	+	snoRNA
1	RF00017	+	snoRNA
1	RF00017	-	snoRNA
1	RF00019	+	snoRNA
1	RF00019	+	snoRNA
1	RF00026	+	snoRNA
1	RF00026	+	snoRNA
1	RF00026	+	snoRNA
1	RF00026	-	snoRNA
1	RF00026	+	snoRNA
1	RF00026	+	snoRNA
1	RF00026	-	snoRNA
1	RF00026	+	snoRNA
1	RF00026	-	snoRNA
1	RF00066	-	snoRNA
1	RF00096	+	snoRNA
1	RF00340	+	snoRNA
1	RF00406	-	snoRNA
1	RF00421	-	snoRNA
1	RF00568	-	snoRNA
1	UHMK1	+	protein_coding
1	ZNF644	-	protein_coding
2	AADAC	+	protein_coding
2	ATP6V1A	+	protein_coding
2	ENSMMUG00000005642	-	protein_coding
2	ENSMMUG00000009807	-	protein_coding
2	ENSMMUG00000011382	-	protein_coding
2	ENSMMUG00000019698	-	protein_coding
2	ENSMMUG00000020716	+	protein_coding
2	ENSMMUG00000021893	+	protein_coding
2	ENSMMUG00000031981	+	protein_coding
2	ENSMMUG00000033661	+	miRNA
2	ENSMMUG00000037789	-	miRNA
2	ENSMMUG00000039083	-	protein_coding
2	ENSMMUG00000040550	-	protein_coding
2	ENSMMUG00000040617	-	lincRNA
2	ENSMMUG00000041661	-	lincRNA
2	ENSMMUG00000042995	-	miRNA
2	ENSMMUG00000043167	+	protein_coding
2	ENSMMUG00000043449	-	miRNA
2	ENSMMUG00000043697	-	protein_coding
2	ENSMMUG00000045385	+	protein_coding
2	ENSMMUG00000046310	-	protein_coding
2	ENSMMUG00000046830	-	protein_coding
2	ENSMMUG00000046959	+	lincRNA
2	ENSMMUG00000047393	-	protein_coding
2	ENSMMUG00000047428	-	protein_coding
2	ENSMMUG00000047525	+	lincRNA
2	ENSMMUG00000048331	-	protein_coding
2	ENSMMUG00000048371	-	protein_coding
2	ENSMMUG00000048451	+	protein_coding
2	FAM162A	+	protein_coding
2	GADL1	+	protein_coding
2	GPR87	-	protein_coding
2	KLHL24	-	protein_coding
2	LMOD3	+	protein_coding
2	NLGN1	-	protein_coding
2	PSMD6	+	protein_coding
2	PYDC2	+	protein_coding
2	RF00003	+	snoRNA
2	RF00004	-	snoRNA
2	RF00012	+	snoRNA
2	RF00015	-	snoRNA
2	RF00017	-	snoRNA
2	RF00019	-	snoRNA
2	RF00019	-	snoRNA
2	RF00019	+	snoRNA
2	RF00019	+	snoRNA
2	RF00019	-	snoRNA
2	RF00019	+	snoRNA
2	RF00026	-	snoRNA
2	RF00026	-	snoRNA
2	RF00026	-	snoRNA
2	RF00026	+	snoRNA
2	RF00026	+	snoRNA
2	RF00026	+	snoRNA
2	RF00066	-	snoRNA
2	RF00100	+	snoRNA
2	RF00100	-	snoRNA
2	RF00418	+	snoRNA
2	RF00424	+	snoRNA
2	RF00425	-	snoRNA
2	RFTN2	+	protein_coding
2	SPATA16	+	protein_coding
2	ZBTB38	-	protein_coding
3	ENSMMUG00000000531	-	protein_coding
3	ENSMMUG00000001411	-	protein_coding
3	ENSMMUG00000003024	-	protein_coding
3	ENSMMUG00000009748	-	pseudogene
3	ENSMMUG00000010340	-	protein_coding
3	ENSMMUG00000012399	-	protein_coding
3	ENSMMUG00000018046	-	protein_coding
3	ENSMMUG00000022130	-	protein_coding
3	ENSMMUG00000033597	+	miRNA
3	ENSMMUG00000035852	-	miRNA
3	ENSMMUG00000037970	+	protein_coding
3	ENSMMUG00000039661	-	miRNA
3	ENSMMUG00000041095	-	protein_coding
3	ENSMMUG00000041358	-	protein_coding
3	ENSMMUG00000041743	-	lincRNA
3	ENSMMUG00000042118	+	protein_coding
3	ENSMMUG00000043157	-	protein_coding
3	ENSMMUG00000043566	-	lincRNA
3	ENSMMUG00000046257	-	protein_coding
3	ENSMMUG00000047999	-	miRNA
3	GPR22	+	protein_coding
3	HBP1	+	protein_coding
3	LCA5L	+	protein_coding
3	mml-let-7c	-	miRNA
3	mml-mir-29a	-	miRNA
3	RF00012	+	snoRNA
3	RF00017	+	snoRNA
3	RF00017	+	snoRNA
3	RF00019	-	snoRNA
3	RF00019	-	snoRNA
3	RF00019	-	snoRNA
3	RF00019	+	snoRNA
3	RF00019	+	snoRNA
3	RF00026	-	snoRNA
3	RF00026	-	snoRNA
3	RF00026	-	snoRNA
3	RF00066	+	snoRNA
3	RF00218	+	snoRNA
3	SRI	+	protein_coding
3	SSMEM1	+	protein_coding
3	ZNF92	-	protein_coding
4	ADGRF4	+	protein_coding
4	ENSMMUG00000000428	+	protein_coding
4	ENSMMUG00000006877	+	protein_coding
4	ENSMMUG00000009092	-	protein_coding
4	ENSMMUG00000011266	-	protein_coding
4	ENSMMUG00000029540	-	protein_coding
4	ENSMMUG00000035473	-	miRNA
4	ENSMMUG00000037897	+	lincRNA
4	ENSMMUG00000039761	-	lincRNA
4	ENSMMUG00000039822	-	protein_coding
4	ENSMMUG00000041545	+	lincRNA
4	ENSMMUG00000042731	+	lincRNA
4	HCRTR2	+	protein_coding
4	mml-mir-30c-2	-	miRNA
4	RF00003	-	snoRNA
4	RF00003	-	snoRNA
4	RF00004	-	snoRNA
4	RF00017	+	snoRNA
4	RF00017	+	snoRNA
4	RF00017	+	snoRNA
4	RF00019	-	snoRNA
4	RF00019	-	snoRNA
4	RF00019	-	snoRNA
4	RF00019	-	snoRNA
4	RF00026	-	snoRNA
4	RF00026	+	snoRNA
4	RF00026	+	snoRNA
4	RF00066	+	snoRNA
4	RF00066	+	snoRNA
4	RF00100	+	snoRNA
4	RF00279	+	snoRNA
4	RF00401	-	snoRNA
4	RNF182	+	protein_coding
4	SUPT3H	-	protein_coding
5	ABHD18	+	protein_coding
5	CNOT6L	+	protein_coding
5	COMMD8	-	protein_coding
5	ENSMMUG00000006011	+	protein_coding
5	ENSMMUG00000011859	+	protein_coding
5	ENSMMUG00000012053	-	protein_coding
5	ENSMMUG00000030179	-	protein_coding
5	ENSMMUG00000037703	+	pseudogene
5	ENSMMUG00000038985	-	miRNA
5	ENSMMUG00000040818	+	lincRNA
5	ENSMMUG00000041403	-	lincRNA
5	ENSMMUG00000041723	-	protein_coding
5	ENSMMUG00000042441	-	miRNA
5	ENSMMUG00000042642	+	lincRNA
5	ENSMMUG00000044468	-	miRNA
5	ENSMMUG00000044945	-	protein_coding
5	ENSMMUG00000044959	+	protein_coding
5	ENSMMUG00000045237	-	protein_coding
5	ENSMMUG00000047796	-	protein_coding
5	ENSMMUG00000047798	+	protein_coding
5	ENSMMUG00000048709	-	lincRNA
5	ENSMMUG00000049186	-	protein_coding
5	FAM149A	+	protein_coding
5	FAM160A1	+	protein_coding
5	IL15	+	protein_coding
5	PALLD	+	protein_coding
5	PTTG2	+	protein_coding
5	RF00001	+	snoRNA
5	RF00001	+	snoRNA
5	RF00004	+	snoRNA
5	RF00017	-	snoRNA
5	RF00017	+	snoRNA
5	RF00017	-	snoRNA
5	RF00019	+	snoRNA
5	RF00019	+	snoRNA
5	RF00019	+	snoRNA
5	RF00026	-	snoRNA
5	RF00026	+	snoRNA
5	RF00026	-	snoRNA
5	RF00026	+	snoRNA
5	RF00278	-	snoRNA
5	RRH	+	protein_coding
6	ENSMMUG00000003893	+	protein_coding
6	ENSMMUG00000029931	-	protein_coding
6	ENSMMUG00000033534	-	miRNA
6	ENSMMUG00000040570	+	protein_coding
6	ENSMMUG00000040713	-	protein_coding
6	ENSMMUG00000041525	+	processed_pseudogene
6	ENSMMUG00000044494	+	protein_coding
6	ENSMMUG00000044702	-	miRNA
6	ENSMMUG00000046592	-	lincRNA
6	ENSMMUG00000047119	+	lincRNA
6	ENSMMUG00000047886	+	protein_coding
6	ENSMMUG00000047890	-	protein_coding
6	ENSMMUG00000047893	+	lincRNA
6	ENSMMUG00000048053	+	protein_coding
6	ENSMMUG00000048783	+	lincRNA
6	ERAP2	+	protein_coding
6	IGIP	+	protein_coding
6	mml-mir-103-1	-	miRNA
6	mml-mir-579	-	miRNA
6	RF00001	-	snoRNA
6	RF00015	-	snoRNA
6	RF00017	+	snoRNA
6	RF00019	+	snoRNA
6	RF00026	+	snoRNA
6	RF00026	+	snoRNA
6	RF00026	+	snoRNA
6	RF00026	-	snoRNA
6	RF00026	+	snoRNA
6	RF00066	-	snoRNA
6	RF00096	-	snoRNA
6	RF00100	-	snoRNA
6	RF00279	-	snoRNA
6	RF00619	+	snoRNA
6	RFESD	+	protein_coding
6	UBLCP1	+	protein_coding
7	AREL1	-	protein_coding
7	CCDC198	-	protein_coding
7	EIF2S1	+	protein_coding
7	ENSMMUG00000001759	+	protein_coding
7	ENSMMUG00000006768	+	protein_coding
7	ENSMMUG00000007369	-	protein_coding
7	ENSMMUG00000010392	+	protein_coding
7	ENSMMUG00000022990	+	protein_coding
7	ENSMMUG00000029299	+	protein_coding
7	ENSMMUG00000029374	+	pseudogene
7	ENSMMUG00000033853	-	miRNA
7	ENSMMUG00000033947	-	miRNA
7	ENSMMUG00000038814	-	protein_coding
7	ENSMMUG00000039581	-	protein_coding
7	ENSMMUG00000041243	+	protein_coding
7	ENSMMUG00000041288	-	lincRNA
7	ENSMMUG00000041953	+	processed_pseudogene
7	ENSMMUG00000042465	-	protein_coding
7	ENSMMUG00000042673	+	protein_coding
7	ENSMMUG00000043426	-	protein_coding
7	ENSMMUG00000043615	+	protein_coding
7	ENSMMUG00000045724	+	pseudogene
7	ENSMMUG00000045727	+	protein_coding
7	ENSMMUG00000046857	-	protein_coding
7	ENSMMUG00000048158	-	miRNA
7	ENSMMUG00000048717	-	protein_coding
7	ENSMMUG00000049065	+	protein_coding
7	LRFN5	+	protein_coding
7	MAPKBP1	+	protein_coding
7	mml-mir-627	-	miRNA
7	RF00001	-	snoRNA
7	RF00012	-	snoRNA
7	RF00017	-	snoRNA
7	RF00017	-	snoRNA
7	RF00017	-	snoRNA
7	RF00017	-	snoRNA
7	RF00019	+	snoRNA
7	RF00019	+	snoRNA
7	RF00019	-	snoRNA
7	RF00019	-	snoRNA
7	RF00026	-	snoRNA
7	RF00026	-	snoRNA
7	RF00026	-	snoRNA
7	RF00093	-	snoRNA
7	RF00181	+	snoRNA
7	RF00181	+	snoRNA
7	RF00181	+	snoRNA
7	RF00181	+	snoRNA
7	RF00181	+	snoRNA
7	RF00181	+	snoRNA
7	RF00181	+	snoRNA
7	RF00181	+	snoRNA
7	RF00181	+	snoRNA
7	RF00181	+	snoRNA
7	RF00181	+	snoRNA
7	RF00181	+	snoRNA
7	RF00181	+	snoRNA
7	RF00181	+	snoRNA
7	RF00181	+	snoRNA
7	RF00400	+	snoRNA
7	RF00409	+	snoRNA
7	RF01186	+	snoRNA
8	ANGPT2	-	protein_coding
8	ANXA13	-	protein_coding
8	ARMC1	-	protein_coding
8	ENSMMUG00000008181	-	pseudogene
8	ENSMMUG00000014786	-	protein_coding
8	ENSMMUG00000037780	-	protein_coding
8	ENSMMUG00000037836	+	protein_coding
8	ENSMMUG00000040732	+	miRNA
8	ENSMMUG00000042885	+	protein_coding
8	ENSMMUG00000043710	-	protein_coding
8	ENSMMUG00000044929	-	protein_coding
8	ENSMMUG00000049131	+	lincRNA
8	EYA1	-	protein_coding
8	mml-mir-597	-	miRNA
8	mml-mir-599	-	miRNA
8	mml-mir-875	-	miRNA
8	NCALD	-	protein_coding
8	NDUFAF6	+	protein_coding
8	NIPAL2	-	protein_coding
8	RF00001	+	snoRNA
8	RF00003	-	snoRNA
8	RF00019	+	snoRNA
8	RF00019	+	snoRNA
8	RF00019	+	snoRNA
8	RF00019	-	snoRNA
8	RF00026	-	snoRNA
8	RF00026	+	snoRNA
8	RF00100	+	snoRNA
8	SBSPON	-	protein_coding
8	TMEM64	-	protein_coding
9	ANKRD22	-	protein_coding
9	C10orf113	-	protein_coding
9	CSGALNACT2	+	protein_coding
9	DDX21	-	protein_coding
9	ENSMMUG00000014576	-	protein_coding
9	ENSMMUG00000017765	+	protein_coding
9	ENSMMUG00000022646	+	pseudogene
9	ENSMMUG00000033560	-	miRNA
9	ENSMMUG00000033824	-	miRNA
9	ENSMMUG00000033847	+	miRNA
9	ENSMMUG00000033892	+	miRNA
9	ENSMMUG00000038734	-	protein_coding
9	ENSMMUG00000040117	+	lincRNA
9	ENSMMUG00000040417	-	protein_coding
9	ENSMMUG00000043867	+	protein_coding
9	ENSMMUG00000045995	+	lincRNA
9	ENSMMUG00000046543	+	lincRNA
9	FAM13C	+	protein_coding
9	FAM149B1	-	protein_coding
9	mml-mir-107	-	miRNA
9	RF00004	-	snoRNA
9	RF00017	-	snoRNA
9	RF00019	+	snoRNA
9	RF00019	-	snoRNA
9	RF00019	+	snoRNA
9	RF00019	-	snoRNA
9	RF00026	+	snoRNA
9	RF00026	-	snoRNA
9	RF00026	-	snoRNA
9	RF00066	-	snoRNA
9	RF00100	+	snoRNA
9	RF00100	+	snoRNA
9	RF00402	+	snoRNA
9	RF00413	-	snoRNA
9	RF02277	-	snoRNA
9	SEC31B	-	protein_coding
10	ENSMMUG00000030968	+	protein_coding
10	ENSMMUG00000033723	+	miRNA
10	ENSMMUG00000033815	+	miRNA
10	ENSMMUG00000040029	-	processed_pseudogene
10	ENSMMUG00000042376	-	protein_coding
10	HAO1	-	protein_coding
10	NCOA3	-	protein_coding
10	RF00017	+	snoRNA
10	RF00017	+	snoRNA
10	RF00019	-	snoRNA
10	RF00019	-	snoRNA
10	RF00026	+	snoRNA
10	RF00100	+	snoRNA
10	RF00275	+	snoRNA
10	RF02199	+	snoRNA
11	CDK17	-	protein_coding
11	DCP1B	-	protein_coding
11	ENSMMUG00000011806	-	protein_coding
11	ENSMMUG00000022290	-	protein_coding
11	ENSMMUG00000032012	+	protein_coding
11	ENSMMUG00000032893	+	miRNA
11	ENSMMUG00000038995	+	protein_coding
11	ENSMMUG00000040788	+	protein_coding
11	ENSMMUG00000041508	+	protein_coding
11	ENSMMUG00000041579	-	lincRNA
11	ENSMMUG00000041844	+	lincRNA
11	ENSMMUG00000043823	-	lincRNA
11	ENSMMUG00000045287	+	protein_coding
11	IRAK3	+	protein_coding
11	LMNTD1	-	protein_coding
11	PMCH	-	protein_coding
11	RF00017	+	snoRNA
11	RF00017	-	snoRNA
11	RF00017	-	snoRNA
11	RF00019	+	snoRNA
11	RF00019	+	snoRNA
11	RF00026	+	snoRNA
11	RF00026	-	snoRNA
11	RF00026	-	snoRNA
11	RF00026	+	snoRNA
11	RF00026	+	snoRNA
11	RF00026	+	snoRNA
11	RF00026	-	snoRNA
11	RF00026	-	snoRNA
11	RF00100	-	snoRNA
11	RF00414	-	snoRNA
11	RF00619	+	snoRNA
11	SLC6A15	-	protein_coding
12	DYNC1I2	+	protein_coding
12	ENSMMUG00000006443	-	protein_coding
12	ENSMMUG00000010554	+	protein_coding
12	ENSMMUG00000019335	+	protein_coding
12	ENSMMUG00000023092	-	protein_coding
12	ENSMMUG00000023812	-	protein_coding
12	ENSMMUG00000031367	-	protein_coding
12	ENSMMUG00000033898	+	miRNA
12	ENSMMUG00000033962	-	miRNA
12	ENSMMUG00000039119	-	protein_coding
12	ENSMMUG00000039500	+	miRNA
12	ENSMMUG00000040000	-	protein_coding
12	ENSMMUG00000040497	+	protein_coding
12	ENSMMUG00000043307	-	protein_coding
12	ENSMMUG00000044940	+	protein_coding
12	ENSMMUG00000045983	+	protein_coding
12	ENSMMUG00000045994	+	protein_coding
12	ENSMMUG00000046265	+	protein_coding
12	ENSMMUG00000046577	-	protein_coding
12	ENSMMUG00000048704	-	protein_coding
12	FMNL2	+	protein_coding
12	GPR1	-	protein_coding
12	GTDC1	-	protein_coding
12	KCNH7	-	protein_coding
12	KIF5C	-	protein_coding
12	MBD5	+	protein_coding
12	RF00001	+	snoRNA
12	RF00004	-	snoRNA
12	RF00017	-	snoRNA
12	RF00019	-	snoRNA
12	RF00026	-	snoRNA
12	RF00026	-	snoRNA
12	RF00026	+	snoRNA
12	RF00066	+	snoRNA
12	RF00066	-	snoRNA
12	RF00561	+	snoRNA
12	RF02271	+	snoRNA
12	RF02271	-	snoRNA
13	ENSMMUG00000014862	+	pseudogene
13	ENSMMUG00000016538	+	protein_coding
13	ENSMMUG00000030817	+	protein_coding
13	ENSMMUG00000030911	+	protein_coding
13	ENSMMUG00000038841	-	protein_coding
13	ENSMMUG00000039970	-	protein_coding
13	ENSMMUG00000043147	-	lincRNA
13	ENSMMUG00000043941	-	miRNA
13	ENSMMUG00000048450	-	lincRNA
13	FANCL	-	protein_coding
13	IGKC	-	protein_coding
13	MORN2	+	protein_coding
13	NLRC4	-	protein_coding
13	RF00004	+	snoRNA
13	RF00015	+	snoRNA
13	RF00019	+	snoRNA
13	RF00026	-	snoRNA
13	RF00026	-	snoRNA
13	RF00026	+	snoRNA
13	RF00026	+	snoRNA
13	RF00045	+	snoRNA
13	RF00066	-	snoRNA
13	RF00066	-	snoRNA
13	RF00100	-	snoRNA
13	RF00156	-	snoRNA
13	RF00325	+	snoRNA
13	RF00325	+	snoRNA
13	RF01233	+	snoRNA
13	TDRD15	+	protein_coding
14	CARD18	-	protein_coding
14	CWC15	-	protein_coding
14	ENSMMUG00000005864	+	protein_coding
14	ENSMMUG00000030886	-	protein_coding
14	ENSMMUG00000037969	-	protein_coding
14	ENSMMUG00000039397	+	protein_coding
14	ENSMMUG00000040762	-	protein_coding
14	ENSMMUG00000044162	+	lincRNA
14	ENSMMUG00000044264	-	lincRNA
14	ENSMMUG00000046904	+	protein_coding
14	ENSMMUG00000047275	+	miRNA
14	ENSMMUG00000047358	-	protein_coding
14	ENSMMUG00000047502	-	lincRNA
14	ENSMMUG00000048501	-	lincRNA
14	IMMP1L	+	protein_coding
14	mml-mir-6128	-	miRNA
14	MRGPRD	+	protein_coding
14	OR5AK2	-	protein_coding
14	RF00001	+	snoRNA
14	RF00017	-	snoRNA
14	RF00017	+	snoRNA
14	RF00019	-	snoRNA
14	RF00026	+	snoRNA
14	RF00026	+	snoRNA
14	RF00026	+	snoRNA
14	RF00026	-	snoRNA
14	RF00100	+	snoRNA
14	SLC36A4	-	protein_coding
14	SRSF8	+	protein_coding
15	ABHD17B	-	protein_coding
15	DCAF10	-	protein_coding
15	ENSMMUG00000013288	-	protein_coding
15	ENSMMUG00000031816	-	pseudogene
15	ENSMMUG00000032539	+	protein_coding
15	ENSMMUG00000037818	+	protein_coding
15	ENSMMUG00000038466	+	protein_coding
15	ENSMMUG00000038799	-	protein_coding
15	ENSMMUG00000038835	-	lincRNA
15	ENSMMUG00000038914	-	protein_coding
15	ENSMMUG00000039002	-	miRNA
15	ENSMMUG00000039732	+	protein_coding
15	ENSMMUG00000041529	-	lincRNA
15	ENSMMUG00000041842	+	lincRNA
15	ENSMMUG00000041881	-	miRNA
15	ENSMMUG00000042962	-	protein_coding
15	ENSMMUG00000046146	+	protein_coding
15	ENSMMUG00000048293	-	protein_coding
15	FBXO10	+	protein_coding
15	mml-mir-491	-	miRNA
15	mml-mir-7-1	-	miRNA
15	mml-mir-876	+	miRNA
15	NR6A1	+	protein_coding
15	RF00001	+	snoRNA
15	RF00004	-	snoRNA
15	RF00017	+	snoRNA
15	RF00019	-	snoRNA
15	RF00019	+	snoRNA
15	RF00026	+	snoRNA
15	RF00026	-	snoRNA
15	RF00026	-	snoRNA
15	RF00026	-	snoRNA
15	RF00030	-	snoRNA
15	RF00157	+	snoRNA
15	RF00286	+	snoRNA
15	RF00322	+	snoRNA
15	RF02271	-	snoRNA
15	RFX3	+	protein_coding
15	SLC25A51	+	protein_coding
16	ABCA9	-	protein_coding
16	ENSMMUG00000005928	+	processed_pseudogene
16	ENSMMUG00000029859	-	protein_coding
16	ENSMMUG00000038467	-	protein_coding
16	ENSMMUG00000039255	-	protein_coding
16	ENSMMUG00000039558	+	protein_coding
16	ENSMMUG00000044554	-	protein_coding
16	ENSMMUG00000046002	-	miRNA
16	ENSMMUG00000046088	+	processed_pseudogene
16	EVI2B	-	protein_coding
16	RF00001	-	snoRNA
16	RF00017	-	snoRNA
16	RF00019	-	snoRNA
16	RF00019	-	snoRNA
16	RF00026	-	snoRNA
16	RF00026	-	snoRNA
16	RF00100	+	snoRNA
16	RF00154	-	snoRNA
16	RF00156	+	snoRNA
16	TADA2A	+	protein_coding
17	CCDC168	-	protein_coding
17	ENSMMUG00000005847	+	protein_coding
17	ENSMMUG00000009018	-	protein_coding
17	ENSMMUG00000020570	-	lincRNA
17	ENSMMUG00000030737	-	protein_coding
17	ENSMMUG00000043993	-	lincRNA
17	ENSMMUG00000046229	-	protein_coding
17	ENSMMUG00000048511	+	protein_coding
17	FNDC3A	+	protein_coding
17	mml-mir-15a	-	miRNA
17	mml-mir-16-1	-	miRNA
17	RF00001	-	snoRNA
17	RF00001	-	snoRNA
17	RF00001	-	snoRNA
17	RF00017	+	snoRNA
17	RF00017	-	snoRNA
17	RF00019	-	snoRNA
17	RF00019	-	snoRNA
17	RF00019	+	snoRNA
17	RF00066	+	snoRNA
17	RF00100	+	snoRNA
17	RF00190	-	snoRNA
17	RF02105	+	snoRNA
17	RF02106	+	snoRNA
17	RF02108	+	snoRNA
17	RNF6	-	protein_coding
17	SETDB2	+	protein_coding
18	ENSMMUG00000005146	-	protein_coding
18	ENSMMUG00000033389	-	miRNA
18	ENSMMUG00000037556	+	lincRNA
18	ENSMMUG00000044288	+	lincRNA
18	mml-mir-133a	-	miRNA
18	RF00017	+	snoRNA
18	RF00019	+	snoRNA
18	RF00405	+	snoRNA
18	RF01233	-	snoRNA
19	ENSMMUG00000006126	-	protein_coding
19	ENSMMUG00000008347	+	protein_coding
19	ENSMMUG00000044857	-	protein_coding
19	FAM187B	-	protein_coding
19	RF00001	+	snoRNA
19	ZNF283	+	protein_coding
19	ZNF568	+	protein_coding
20	ENSMMUG00000002294	+	protein_coding
20	ENSMMUG00000018286	+	protein_coding
20	ENSMMUG00000040656	-	protein_coding
20	ENSMMUG00000041524	+	protein_coding
20	RF00001	-	snoRNA
20	RF00019	+	snoRNA
20	RF00019	-	snoRNA
20	RF00019	-	snoRNA
20	RF00019	-	snoRNA
20	RF00026	-	snoRNA
20	RF00156	+	snoRNA
20	TAT	-	protein_coding
X	ENSMMUG00000045189	-	lincRNA

[truncated: 6 more sheets: Table S11, Table S12, Table S13, Table S14, Table S15, Table S16]
